# Supplementary material for: Age-associated changes to neuronal dynamics involve a disruption of excitatory/inhibitory balance in C. elegans
Source: eLife. 2022 Jun 15;11:e72135. doi: 10.7554/eLife.72135 (PMC9273219; doi:10.7554/eLife.72135)
Supplement: Figure 1—source data 1. [file elife-72135-fig1-data1.xlsx]

## Sheet: Figure 1-source data1
	REVERSAL FREQUENCY						ANTERIOR TOUCH RESPONSIVENESS (responses out of 5)
	Age (day of adulthood)	Time (min)	Reversals	Frequency (reversals per min)			Day1	Day3	Day6	Day9	Day12
	Day1	2.25	4	1.77778			3	5	5	4	4
		2.94167	4	1.35977			5	4	4	3	4
		3.03333	3	0.989011			4	4	5	1	3
		3.275	1	0.305344			5	3	4	3	0
		3.34167	2	0.598504			5	5	2	2	5
		3.45833	2	0.578313			4	3	1	4	3
		5.475	4	0.730594			4	4	4	4	5
		7.64167	6	0.785169			3	4	5	2	1
		9.3	0	0			5	3	4	3	4
	Day3	2.725	5	1.83486			5	2	2	4	1
		3.0625	2	0.653061			3	2	4	5	2
		3.0625	0	0			5	2	5	5	1
		3.0625	4	1.30612			5	5	1	5	0
		4.19167	2	0.477137			5	3	3	1	0
		4.3	2	0.465116			5	3	5	5	4
		4.8375	7	1.44703			5	5	3	4	5
		5.05417	2	0.395713			5	4	3	4	4
		5.4875	2	0.364465			5	5	5	4	2
		6.45833	10	1.54839			5	5	2	3	3
		6.68333	8	1.19701			5	3	5	5	3
		6.82083	8	1.17288				4	4	2	1
		7.52917	0	0				3	5	2	5
		7.70833	10	1.2973				4	3	5	2
		9.64583	10	1.03672				4	4	5	1
		10.45	7	0.669856				4	4	3	4
		10.45	15	1.43541				3	4	1	4
		10.45	9	0.861244				3	4	4	3
	Day6	2.68333	4	1.49068				4	5	3	1
		2.79167	2	0.716418				4	3	4	0
		3.05	4	1.31148				5	4	5	1
		3.575	1	0.27972				5	3	5	0
		4.35833	11	2.5239				5	3	3	0
		4.71667	5	1.06007				2	4	3	0
		5.25833	3	0.570523				1	3	0
		5.86667	9	1.53409				5	4	0
		5.96667	8	1.34078				5	4	4
		6.63333	4	0.603015				5	5	1
		6.74167	3	0.444994				4	5	4
		6.89167	3	0.435308				4	4	1
		7.24167	7	0.966628				4	4	5
		8.05	12	1.49068				4	2	5
		9.35833	14	1.49599				4	4	2
		12.8667	14	1.08808				5	3	3
		14.2167	15	1.0551				3	5	4
		14.2167	18	1.26612					4	1
		14.2167	15	1.0551					5	4
		14.2167	15	1.0551					4	3
		14.2167	16	1.12544					4	2
		14.2167	17	1.19578					2	1
	Day9	2.575	5	1.94175					3	5
		3.15833	6	1.89974					3	4
		3.32083	3	0.903388					4	4
		3.46667	3	0.865385					2	4
		3.75	3	0.8
		3.85417	9	2.33514
		4.11667	5	1.21457
		6.82083	13	1.90593
		6.96667	13	1.86603
		7.0125	10	1.42602
		11.4958	22	1.91374
		11.4958	22	1.91374
		11.4958	24	2.08771
		11.4958	17	1.4788
