# Supplementary material for: Age-associated changes to neuronal dynamics involve a disruption of excitatory/inhibitory balance in C. elegans
Source: eLife. 2022 Jun 15;11:e72135. doi: 10.7554/eLife.72135 (PMC9273219; doi:10.7554/eLife.72135)
Supplement: Figure 1—source data 2. [file elife-72135-fig1-data2.xlsx]

## Sheet: Figure 1-source data 2
	RISE TIME
	Day1		Day3		Day6		Day9		Day12
	Worm	Rise Time (sec)	Worm	Rise Time (sec)	Worm	Rise Time (sec)	Worm	Rise Time (sec)	Worm	Rise Time (sec)
	1	1.73171	1	2.79881	1	1.32819	1	2.31362	1	6.06658
		3.76644		1.72539		1.90193	2	2.01808		6.04893
	2	2.3901	2	2.14017		0.89618		2.11606		4.91753
		1.64981		2.24712		1.13421	3	2.21851		5.99981
	3	3.85266		1.57363		0.646157		2.98958	2	1.11995
		2.20844		2.52707	2	2.05685	4	5.49777		1.12832
	4	1.57698	3	1.25753		3.0351		7.87836	3	2.25816
	5	4.45048	4	2.33157		3.23805		13.9125		3.18783
		4.49602		2.70746		2.88257		10.8946		3.55172
	6	0.664468	5	3.31786		4.38025		11.7225	4	2.20877
	7	1.49053	6	3.9958	3	2.31105	5	2.32219		1.46745
	8	2.33205		0.755593	4	1.913		3.66547		1.62245
		3.76315		0.765866	5	2.86028		3.04288	5	9.15109
		2.15991		0.917345	6	2.53818		2.75568		4.18858
	9	0.938707		0.792852	7	2.53988		2.68726		3.68046
		1.03189		0.607814		3.06406	6	2.56905	6	1.94169
	10	1.45899	7	1.08166	8	2.94251	7	10.4183		1.89712
		1.56024		1.04642		3.98259		7.49983	7	3.13014
	11	3.15182		1.00204		8.15529	8	4.1137		5.72188
	12	2.01556		2.13129	9	1.62644		3.38039		9.31746
		3.57909	8	1.63591		1.01151	9	4.0412	8	11.0609
	13	5.34857		2.33226		1.72731	10	3.33312		8.39576
		3.41141		1.26389		1.23271		4.58034	9	0.977353
	14	5.06934	9	2.14717		1.50896	11	2.91706		2.47872
		3.39105		1.97118	10	6.35022		2.96554		2.16026
		2.05855	10	1.92524		6.11462		2.85126		2.84122
	15	1.9243	11	2.80284		3.83771		3.32336		4.69906
	16	2.02948	12	4.16703		6.63652		5.3005	10	17.4925
	17	2.4854		3.66004		8.0225		7.73844		14.6062
		2.40604	13	3.22276		8.67384	12	3.18857		9.98685
		2.38899		1.98732	11	4.37627		4.74081		15.9206
	18	1.58588		4.84127	12	4.30428	13	2.96157	11	5.56918
	19	2.31378		5.16919		3.59779	14	2.39606		5.02672
		1.7048		4.73881		4.02101	15	2.11071		2.37454
	20	3.0869				2.89261		1.94126		1.74508
		4.0509			13	1.57955	16	2.61444	12	7.88881
		2.47085						4.89845		12.5394
								7.00244	13	0.991428
										1.08324
										1.08914
										1.18159
									14	1.73452
										1.88513
	FALL TIME
	Day1		Day3		Day6		Day9		Day12
	Worm	Fall Time (sec)	Worm	Fall Time (sec)	Worm	Fall Time (sec)	Worm	Fall Time (sec)	Worm	Fall Time (sec)
	1	10.5136	1	13.1934	1	10.1241	1	14.8671	1	15.404
		8.52663	2	8.33734		11.7305	2	15.9098		13.5189
	2	16.838		7.29962		18.448		10.4829	2	13.225
	3	10.5612		7.32415	2	8.64185	3	19.6578		11.2507
	4	12.4268	3	18.6399		8.56076	4	8.43132		10.8643
		12.1899		17.9801		8.70751		7.76793		12.1162
	5	13.6022	4	9.73823		8.45968		6.31591	3	12.2207
	6	16.6879		10.5555	3	35.4622		7.84716		10.7818
	7	13.4442	5	10.1468	4	16.1545		9.19843	4	12.9876
	8	10.773		10.8266	5	12.1476	5	16.9534		9.92313
	9	12.5138		9.50961	6	11.7858		12.9485	5	16.0968
	10	11.7192		4.9233		10.9548		15.5726		19.6902
		10.6268		15.0478		11.9594		17.1056	6	15.6541
	11	14.1347	6	8.86264	7	12.7449	6	13.8383		15.3627
	12	17.3295		12.116		10.7585	7	15.1058	7	13.8943
	13	10.6912	7	14.2926	8	10.9941		16.1745		13.0239
		11.8706		10.3285		10.8976	8	13.4464	8	12.6655
	14	8.45031	8	12.8593		10.7831		18.9735		12.898
	15	8.45402	9	26.712		11.7297	9	19.5498		13.1833
		8.60141	10	26.9396		10.6251		18.2146		15.0332
		8.38322		27.0736		12.5022		25.5043	9	11.3109
	16	14.8772	11	13.1931	9	14.6844	10	11.4092	10	17.5406
		14.4309		12.7788	10	15.099		9.78045		10.4818
	17	16.6057		15.2819		13.5278	11	15.2394		9.99344
		14.8604				11.3655		15.1772	11	9.49792
		15.9048				12.09		12.7446		10.3987
	18	14.6715			11	8.45229	12	23.1553	12	13.2456
		12.9409				12.3513	13	16.7102		11.9203
	19	19.2079						16.1301	13	10.5438
		11.3619					14	13.9563
		12.8173						15.9944
	20	10.572						11.4344
		11.7335
