# Supplementary material for: Age-associated changes to neuronal dynamics involve a disruption of excitatory/inhibitory balance in C. elegans
Source: eLife. 2022 Jun 15;11:e72135. doi: 10.7554/eLife.72135 (PMC9273219; doi:10.7554/eLife.72135)
Supplement: Figure 1—source data 3. [file elife-72135-fig1-data3.xlsx]

## Sheet: Figure 1-source data 3
	Duty ratio (time active/ inactive) of the AVA interneuron
	Day1	Day3	Day6	Day9	Day12
	0.12125	0.40625	0.48875	0.777083	0.765833
	0.313333	0.324167	0.417083	0.704583	0.772083
	0.172917	0.1575	0.737917	0.524583	0.658333
	0.27125	0.25375	0.569167	0.493333	0.2425
	0.243333	0.122083	0.805417	0.263333	0.765833
	0.282083	0.457917	0.12	0.3425	0.555833
	0.10625	0.32625	0.397917	0.466667	0.6775
	0.20875	0.30875	0.390833	0.13875	0.464583
	0.345833	0.117083	0.505833	0.578333	0.48
	0.0575	0.372917	0.342083	0.556667	0.768333
	0.333333	0.09375	0.515	0.32375	0.624583
	0.120417	0.281667	0.476667	0.40625	0.703333
	0.189583	0.243333	0.273333		0.354583
	0.159167				0.619167
	0.310417				0.75
	0.35375				0.585833
	0.359583
	0.29875
	0.27125
	0.390417
	0.309583
	Calcium Transient Frequencies in the AVA interneuron (over 10 min.)
	Day1		Day3		Day6		Day9		Day12
	Count	Frequency (per min.)	Count	Frequency (per min.)	Count	Frequency (per min.)	Count	Frequency (per min.)	Count	Frequency (per min.)
	2	0.2	6	0.6	5	0.5	0	0	5	0.5
	5	0.5	4	0.4	6	0.6	3	0.3	5	0.5
	7	0.7	2	0.2	1	0.1	5	0.5	7	0.7
	3	0.3	2	0.2	1	0.1	5	0.5	2	0.2
	6	0.6	3	0.3	0	0	5	0.5	5	0.5
	8	0.8	7	0.7	1	0.1	4	0.4	8	0.8
	1	0.1	6	0.6	5	0.5	7	0.7	7	0.7
	2	0.2	5	0.5	4	0.4	2	0.2	3	0.3
	6	0.6	2	0.2	5	0.5	4	0.4	4	0.4
	2	0.2	0	0	8	0.8	5	0.5	3	0.3
	4	0.4	1	0.1	7	0.7	3	0.3	5	0.5
	1	0.1	2	0.2	4	0.4	1	0.1	5	0.5
	4	0.4	6	0.6	3	0.3			6	0.6
	5	0.5							3	0.3
	4	0.4							5	0.5
	3	0.3							4	0.4
	4	0.4
	3	0.3
	3	0.3
	6	0.6
	6	0.6
	Durations of Calcium Transients in the interneuron AVA
	Day1		Day3		Day6		Day9		Day12
	Worm	Duration (sec)	Worm	Duration (sec)	Worm	Duration (sec)	Worm	Duration (sec)	Worm	Duration (sec)
	1	34.5	1	12	1	51.25	1	109.25	1	50.75
		38.25		11.5		39.5		203.25		64.25
	2	23.75		24.25		38		110.25		110
		53.75		127		68.75	2	104.75		33
		20.25		38.25		81.5		76.5		165.25
		51.25		30.75	2	18.25		53.25	2	35.25
		39	2	100.25		33.25		20		164.5
	3	6.5		17.75		44.5		26.75		74.75
		10.25		58		44	3	37.75		79
		11		18.5		54.75		31.25		35.5
		21	3	11		33.25		37.75	3	29.25
		18.25		83.5	3	397		37		75.75
		30.75	4	83	4	115.5		42.25		40
		6		69.25	5	72	4	37.5		71
	4	15.25	5	27.75	6	47.5		21		34.5
		68.5		10.75		45.25		36.25		57.25
		71.75		34.75		16.25		26.25		18
	5	11.5	6	8		65.75		11.25	4	88.5
		10.25		34.5		64	5	53.75		57
		32.25		47	7	55.75		29.25	5	69.25
		25.5		58		57		48.25		97.75
		27.75		33.5		51.5		74.25		24.25
		25.25		23		70.25	6	68.25		98.75
	6	51		21.5	8	56		23		115.25
		30.25	7	21.75		65.75		29	6	45
		9		4.75		50		45.5		38.5
		11		46.5		80.5		55.75		37.25
		15		51.75		51.25		34		50.75
		10		14.25	9	35		24.5		24.75
		23.75		48.5		29.5	7	19.75		50.5
		19.25	8	86.5		5.5		41.5		27.75
	7	63.75		2.25		28	8	55.5		45.75
	8	75.75		51		22.75		53	7	31.75
		49.5		16.5		33.75		77.5		39
	9	20		29		31.5		30		26.25
		18.25	9	26.75		19.25	9	59		54
		3.25		43.5	10	52.5		45.25		65.5
		24	10	56.25		45.25		67.25		47.75
		19	11	96.25		23.25		73.25		93.75
	10	40.75		72.75		61.75		47.5	8	71.25
		14.5	12	11.75		18.25	10	73.25		103.75
		4.75		33.5		82.5		17.5		62.75
	11	54.5		36.5		25.5		63.25	9	73
		34.75		19	11	82	11	173		72
		56.5		19.75		76.25				61
		42.5		25.5		37				77.5
	12	72.25				52			10	261
	13	4.75			12	43				94.25
		11				52.75				94.25
		24.25				61			11	65.5
		73.75								59.25
	14	13.5								67.75
		19.75								70.75
		29.25								60.25
		19							12	120.5
		14								14.25
	15	65								93.25
		57.5								92
		43.5								57.25
		20.25							13	13.5
	16	41.5								15
		60.5								46.5
		50								54.5
	17	63								31.5
		21								51.75
		62.5							14	7.75
		69.25								189
	18	59.25								111.25
		60.5							15	57
		59.5								35.75
	19	34								53.75
		37.75								151.25
		37								97.75
	20	52.25							16	90.25
		39.25								186
		53.25								31.25
		40.5								44
		28
		21
	21	45.5
		57.5
		6.25
		18
		25.75
		32.75
