# Supplementary material for: Age-associated changes to neuronal dynamics involve a disruption of excitatory/inhibitory balance in C. elegans
Source: eLife. 2022 Jun 15;11:e72135. doi: 10.7554/eLife.72135 (PMC9273219; doi:10.7554/eLife.72135)
Supplement: Figure 2—source data 1. [file elife-72135-fig2-data1.xlsx]

## Sheet: Figure 2-source data 1
Variance explained by Principal Components 1-5 for each worm per condition
	Day1 of adulthood	Worm 1	2	3	4	5	6	7	8	9	10	11	12	13	14	15	16	17	18	19	20
	PC1	45.0632	50.2793	38.6828	51.4732	49.4781	48.3491	47.4592	51.874	51.5844	55.8478	51.0202	62.7703	56.8749	47.8853	56.0204	52.4431	44.0344	51.4918	42.4128	33.6126
	PC2	15.0465	13.5386	25.4991	17.0056	17.3851	14.3768	19.939	16.9935	14.3421	9.54291	14.1778	16.3901	16.3288	22.797	19.9095	9.94696	15.0332	17.0506	36.8797	23.8061
	PC3	7.3737	10.3968	11.3406	9.99402	9.90662	9.60938	9.27269	7.04271	9.33951	7.79122	7.47554	7.20393	10.249	9.52903	7.78764	8.65893	11.8244	7.01471	6.08245	13.1145
	PC4	6.16624	5.25436	5.74524	5.31071	5.63414	5.13702	4.20988	5.65207	7.62563	5.56491	5.42545	3.68581	5.80006	5.59538	3.20888	4.92744	10.3133	5.2721	3.44606	5.84751
	PC5	4.81749	3.62174	3.51999	4.03146	3.12505	3.53749	3.08159	4.43213	4.19858	4.31052	4.3611	2.33228	2.36719	2.90797	2.37763	4.18438	3.70108	2.74228	1.97958	4.48697
	Day3 of adulthood
	PC1	53.1031	46.0349	60.999	53.4518	61.3502	63.2667	61.4786	65.6358	69.8155	59.9039
	PC2	19.159	25.7607	16.0082	19.8042	12.9014	16.7009	13.0668	14.2333	18.6453	24.7323
	PC3	7.15744	5.67778	9.49831	13.1817	8.74343	5.19574	8.54393	8.94573	4.27879	4.18749
	PC4	5.63124	4.33282	2.75835	2.76286	5.55178	2.83458	4.54901	3.16521	1.65713	2.41207
	PC5	3.63085	3.3952	2.45053	1.92886	2.32873	1.94767	2.13837	1.43646	1.50576	1.71987
	Day6 of adulthood
	PC1	53.6537	71.9687	52.2828	61.1042	47.2416	62.9027	49.6527	40.5254	37.5267	55.7474
	PC2	11.5769	12.2001	13.0547	9.82906	20.1977	14.1371	14.5344	21.5094	22.6575	13.4786
	PC3	8.06515	3.88919	11.777	8.13923	13.6627	4.31669	10.5612	13.4428	13.3844	7.09232
	PC4	5.70691	2.58984	7.56998	4.02076	5.49091	2.89735	4.55349	4.37902	7.4793	5.31318
	PC5	4.45964	1.46814	4.07186	3.2396	2.81006	2.83384	4.07722	3.20589	4.41068	3.81425
	Day9 of adulthood
	PC1	73.016	55.6827	84.2283	63.5463	54.2118	68.7663	56.6785	75.5788	65.7063	69.5201	36.9689	53.508	55.0041	33.7944	51.4149	43.4366	36.5865	45.1412	76.0903	87.8233
	PC2	8.66284	9.75096	3.8136	14.282	18.0377	7.63604	14.9494	8.00356	12.739	19.8227	27.6696	18.6709	13.215	26.962	17.8002	17.3756	24.8242	20.1886	4.77742	6.36992
	PC3	4.61695	5.21506	2.47666	5.91842	8.96785	7.0667	9.95551	4.32528	6.19291	2.75199	9.3383	8.74471	11.0408	14.3963	12.2676	12.6812	12.9246	12.7633	4.52384	1.52671
	PC4	3.63078	3.93451	2.10575	5.1699	5.64818	3.57142	3.20102	2.96324	3.54071	1.7774	4.42566	4.70607	4.86132	5.1724	4.09681	5.24603	4.10349	4.81257	3.4238	0.857317
	PC5	2.14495	2.46017	1.03025	3.01065	2.99115	1.89831	3.09075	2.00605	2.52253	1.08938	3.54273	3.53726	3.86422	3.0708	3.29495	3.53564	3.06091	3.48333	2.15183	0.716759
	Day12 of adulthood
	PC1	63.2242	90.0116	67.5842	71.9648	46.612	49.8139	51.6266	52.549	28.0537	62.234
	PC2	15.9353	1.89847	16.6401	14.3303	19.2376	13.0235	8.55047	18.5674	14.0352	11.8471
	PC3	9.34454	1.37156	3.41494	3.29578	10.149	6.52573	4.73341	7.9833	6.47447	6.86395
	PC4	2.68333	1.20309	2.97183	2.11859	6.16251	4.39577	4.0663	3.68909	5.43987	2.78084
	PC5	1.81979	0.845892	2.26227	1.32894	3.26123	4.14423	3.142	2.98585	4.10176	1.98348
