# Supplementary material for: Age-associated changes to neuronal dynamics involve a disruption of excitatory/inhibitory balance in C. elegans
Source: eLife. 2022 Jun 15;11:e72135. doi: 10.7554/eLife.72135 (PMC9273219; doi:10.7554/eLife.72135)
Supplement: Figure 2—source data 2. [file elife-72135-fig2-data2.xlsx]

## Sheet: Figure S2
	GCAMP6s signal to noise ratio (SNR) by age
	SNR=20log10(S/N)
	Day1	Day3	Day6	Day9	Day12
	17.3835	12.404	24.5439	27.5807	-25.6352
	17.2716	29.9963	22.2229	17.3899	22.6749
	17.1455	27.1195	33.2361	21.6369	27.8887
	24.0566	6.42491	16.4901	14.1779	22.9427
	24.842	43.8838	15.8333	18.1537	33.9143
	28.0754	29.2694	30.8966	24.4551	25.784
	34.1024	30.23	18.5573	16.3974	30.3024
	29.057	27.9542	28.8039	20.1683	23.3344
	18.6496	30.1529	23.4091	28.89	36.9442
	14.3953	34.6135	19.618	25.6716	34.8123
	14.5427	22.8358	17.1337	23.6151	22.424
	30.7575	35.5796	19.7352	24.2205	11.2566
	16.7053	16.0244	10.3928	14.2066	28.1078
	8.99686	9.92419	27.8429	28.6329	13.7167
	24.7995	27.151	24.5193	21.8048	46.9731
	38.5844	29.7935	20.1505	20.8456	14.7208
	37.1619	22.0717	22.3636	10.4689	36.248
	29.4285	34.2988	29.077	30.3389	20.8553
	22.2699	23.0973	28.761	47.9946	23.588
	33.9415	39.2863	34.0406	41.1172	29.4717
	29.1987	36.6541	28.7636	22.525	30.3166
	25.0838	33.2698	36.9349	17.2337	9.68263
	0.589096	32.9084	43.4812	33.3198	29.0792
	25.023	21.1066	14.2929	22.8704	-0.323567
	19.1736	22.6447	12.4422	21.4523	20.4984
	46.5776	24.6965	32.6885	20.0806	23.3571
	29.026	20.7403	20.0656	12.4202	35.218
	26.0548	23.6029	26.3726	13.6583	29.7996
	25.1669	20.7695	33.8788	32.6734	26.6209
	29.1286	18.3541	30.8507	29.8518	29.3078
	28.3134	22.8475	33.3699	33.879	28.8584
	23.686	21.6272	19.548	47.0308	48.124
	33.3845	43.5562	27.712	30.2111	29.9806
	19.2216	18.6385	44.9927	36.4282	19.9495
	27.2719	27.9149	29.3373	18.5835	43.8692
	26.9884	34.3351	20.5988	29.0011	26.0613
	19.6679	25.5704	16.2522	27.548	34.4575
	24.1266	16.9965	20.4952	18.6488	31.1751
	28.91	13.1091	30.4866	29.7021	21.6435
	24.8869	19.9751	22.7003	22.5214	39.7174
	20.7263	22.434	32.6445	36.2496	49.0799
	20.1866	34.0059	31.4953	23.8178	29.5624
	31.2465	33.5282	29.2254	31.617	25.0787
	27.6807	47.7286	30.6149	14.4036	24.5874
	21.7086	29.9962	31.9563	40.2957	37.6995
	25.2068	38.7333	26.2988	19.9826	38.642
	17.3627	23.1538	22.0033	24.5147	42.5866
	35.1983	10.3545	32.0111	19.1488	43.0051
	25.3463	17.7419	6.96306	14.6023	8.13557
	21.8915	37.626	34.2674	16.9419	19.6362
	10.4036	23.1756	25.2883	28.7241	28.1383
	18.8994	30.8853	37.0071	26.3603	20.7404
	19.8325	22.2997	25.6622	33.7428	26.2204
	28.3145	28.6961	33.5785	43.0246	32.6235
	29.5358	27.0274	29.2544	28.1853	21.9666
	22.269	38.1492	47.6493	30.4799	23.9257
	15.0142	30.275	17.147	33.8784	18.5464
	21.0684	24.304	27.067	19.8011	25.7154
	20.3104	24.0799	25.9296	25.1725	19.848
	27.2473	32.8811	36.1855	37.9945	31.6511
	36.5304	17.5256	28.1204	26.9576	23.1115
	16.6348	15.7263	13.9835	24.3594	21.1184
	14.607	35.3288	27.5637	23.9454	23.8511
	25.5431	28.4546	21.3513	42.449	15.2568
	24.3525	30.1014	31.1141	37.2613	19.8052
	13.2279	47.1743	40.6858	33.3342	22.5614
	29.3661	23.46	44.7562	28.3473	11.4732
	25.5349	41.9382	6.09344	24.5168	12.7287
	23.6789	32.6276	28.6536	24.5172	27.4575
	21.295	22.7753	22.0654	34.2705	18.406
	22.4706	16.3141	23.9955	25.3708	23.9764
	25.6366	30.0321	14.1052	20.9476	21.4936
	10.7189	13.4544	18.5988	31.3924	23.9451
	22.7075	34.8658	38.3028	23.2114	23.2809
	9.7371	14.6428	20.6082	29.2347	21.9177
	22.489	24.8543	20.0426	25.4166	10.4797
	25.2607	36.9808	25.3151	24.7465	10.3954
	17.9402	30.8311	22.8438	12.3595	17.864
	34.5394	35.3323	36.4276	38.7484	6.06964
	23.3953	25.8702	19.2828	31.1641	13.8849
	27.2595	30.9714	29.5015	21.1059	6.69188
	23.1719	22.4185	39.7427	8.84151	13.7413
	17.5185	21.1572	15.4499	24.5565	18.3322
	-9.25265	22.6222	16.345	34.3322	4.08909
	20.8774	22.4059	24.4578	11.918	16.8446
	39.0045	32.1169	15.2471	13.3921	43.1781
	31.0826	34.5492	25.1725	23.3592	23.1178
	29.267	29.9576	24.7025	43.2453	30.9451
	35.569	25.413	28.0846	21.498	37.1011
	45.5638	29.8972	11.9202	25.7396	22.2953
	32.4363	16.3488	15.658	27.262	32.4738
	29.6214	28.5663	18.5596	26.505	22.1861
	32.4208	18.975	26.4627	31.7843	33.5447
	34.9145	48.6002	14.2974	15.4452	24.1976
	42.1169	26.4788	22.089	36.5443	23.8253
	34.0162	35.2498	20.8887	39.7793	33.5661
	20.9457	36.4671	6.10395	18.3902	22.5504
	29.9991	25.5691	16.6668	19.0926	21.0934
	17.5898	31.7195	20.4978	30.5572	15.1161
	22.7245	25.0115	38.0987	32.1455	19.377
	18.9596	25.1021	37.4012	36.84	13.7432
	28.4701	29.1651	33.5039	17.3238	19.5815
	24.1712	46.5765	26.9907	24.7796	6.81179
	36.229	39.6274	30.2943	33.8274	12.3365
	23.0565	49.7483	35.8472	33.6501	16.9515
	29.3333	29.1555	17.4187	32.6265	14.1434
	30.0729	30.9131	23.5726	17.0506	20.7286
	26.001	26.612	28.9772	27.5457	6.53203
	28.8547	6.96254	30.3292	15.3291	20.9783
	10.4485	18.8244	21.89	15.8638	11.4778
	42.012	22.7129	26.5976	27.6742	21.8396
	44.8375	22.511	29.5833	19.9621	30.1635
	16.2329	45.7057	31.8523	27.0337	18.0817
	18.7856	30.915	26.1355	35.2136	23.8506
	20.6774	25.9389	21.4329	36.3562	35.6544
	26.5427	31.4525	24.7628	38.5083	16.3551
	33.6814	25.567	33.2302	-7.53901	32.8276
	20.2735	27.8961	36.4759	34.5761	21.4282
	26.2531	27.5537	32.2589	35.7995	20.837
	23.7646	36.8298	37.8276	27.724	21.2579
