# Supplementary material for: Age-associated changes to neuronal dynamics involve a disruption of excitatory/inhibitory balance in C. elegans
Source: eLife. 2022 Jun 15;11:e72135. doi: 10.7554/eLife.72135 (PMC9273219; doi:10.7554/eLife.72135)
Supplement: Figure 2—source data 3. [file elife-72135-fig2-data3.xlsx]

## Sheet: Figure 3-source data 3
	Tissue autofluorescence among head-region neurons
		Day1	Day9
	Worm1	106.687	105.967
	Worm2	108.498	114.379
	Worm3	109.356	106.773
	Worm4	108.256	107.162
	Worm5	108.26	111.398
	Worm6	108.278	119.347
	Worm7	107.209	104.442
	Worm8	112.096	108.985
	Worm9	109.621	106.922
	Worm10	113.234	106.902
