# Supplementary material for: Age-associated changes to neuronal dynamics involve a disruption of excitatory/inhibitory balance in C. elegans
Source: eLife. 2022 Jun 15;11:e72135. doi: 10.7554/eLife.72135 (PMC9273219; doi:10.7554/eLife.72135)
Supplement: Figure 3—source data 1. [file elife-72135-fig3-data1.xlsx]

## Sheet: Figure 3-source data 1
	Power Spectral Density (PSD) 40% Spectral Edge							NEGATIVE CORRELATION PROPORTION
	Day1	Day3	Day6	Day9	Day12			Day1	Day3	Day6	Day9	Day12
	0.05	0.06	0.05	0.12	0.09			0.0333333	0.0371795	0.0435897	0.0128205	0.00128205
	0.09	0.06	0.08	0.08	0.06			0.139744	0.0269231	0.0320513	0.05	0.0115385
	0.05	0.06	0.08	0.11	0.07			0.182051	0.0717949	0.0820513	0.0166667	0.00897436
	0.05	0.06	0.05	0.05	0.08			0.111538	0.121795	0.0653846	0.0641026	0.0217949
	0.05	0.06	0.06	0.06	0.05			0.138462	0.121795	0.0833333	0.05	0.0474359
	0.04	0.06	0.07	0.08	0.06			0.0769231	0.0128205	0.00769231	0.00384615	0.0141026
	0.05	0.04	0.08	0.06	0.08			0.138462	0.103846	0.0730769	0	0.0128205
	0.04	0.1	0.06	0.12	0.06			0.117949	0.0448718	0.0102564	0.0564103	0.0333333
	0.05	0.04	0.1	0.11	0.12			0.232051	0.00128205	0.025641	0.00641026	0.0320513
	0.1	0.05	0.09	0.07	0.07			0.0333333	0.0653846	0.0615385	0.0230769	0.271795
	0.06			0.1				0.0166667			0.00641026
	0.05			0.06				0.176923			0.0589744
	0.04			0.09				0.108974			0.0384615
	0.05			0.08				0.175641			0.0102564
	0.06			0.08				0.151282			0.0141026
	0.04			0.07				0.0282051			0.025641
	0.05			0.05				0.155128			0.0551282
	0.05			0.06				0.101282			0.0397436
	0.07			0.05				0.107692			0.0730769
	0.09			0.09				0.0717949			0.00512821
								POSITIVE CORRELATION PROPORTION
								Day1	Day3	Day6	Day9	Day12
								0.187179	0.205128	0.189744	0.357692	0.526923
								0.202564	0.232051	0.285897	0.307692	0.426923
								0.230769	0.288462	0.115385	0.580769	0.420513
								0.232051	0.307692	0.246154	0.166667	0.370513
								0.330769	0.342308	0.344872	0.29359	0.316667
								0.35641	0.382051	0.221795	0.416667	0.0923077
								0.275641	0.34359	0.176923	0.461538	0.0923077
								0.333333	0.433333	0.194872	0.44359	0.266667
								0.297436	0.541026	0.264103	0.469231	0.0538462
								0.157692	0.494872	0.444872	0.505128	0.30641
								0.283333			0.192308
								0.270513			0.320513
								0.35641			0.142308
								0.329487			0.114103
								0.297436			0.308974
								0.257692			0.344872
								0.357692			0.130769
								0.230769			0.225641
								0.315385			0.484615
								0.185897			0.396154
