# Supplementary material for: Age-associated changes to neuronal dynamics involve a disruption of excitatory/inhibitory balance in C. elegans
Source: eLife. 2022 Jun 15;11:e72135. doi: 10.7554/eLife.72135 (PMC9273219; doi:10.7554/eLife.72135)
Supplement: Figure 3—source data 2. [file elife-72135-fig3-data2.xlsx]

## Sheet: Figure S6B
	Negative Correlation Proportion with 120 neurons analyzed per animal
	Day1	Day9
	0.0138655	0.00938375
	0.0939776	0.0355742
	0.0901961	0.0317927
	0.0497199	0.0239496
	0.0676471	0.0165266
	0.0467787	0.0222689
	0.0512605	0.0530812
	0.0985994	0.0264706
	0.106443	0.00938375
	0.0141457	0.0497199
	0.0218487	0.0210084
	0.0813725	0.0406162
	0.0613445	0.019888
	0.0659664	0.0170868
	0.0455182	0.0196078
	0.0246499	0.0166667
	0.0844538	0.0240896
	0.0532213	0.0221289
	0.047479	0.0245098
	0.0701681	0.00546218
