# Supplementary material for: Age-associated changes to neuronal dynamics involve a disruption of excitatory/inhibitory balance in C. elegans
Source: eLife. 2022 Jun 15;11:e72135. doi: 10.7554/eLife.72135 (PMC9273219; doi:10.7554/eLife.72135)
Supplement: Figure 3—source data 3. [file elife-72135-fig3-data3.xlsx]

## Sheet: Figure 3-source data 3
	Negative Correlation Proportion
	Comparison between 10 and 20 minute imaging trials
	10 min	20 min
	0.0128205	0.0307692
	0.05	0.025641
	0.0166667	0.0192308
	0.0641026	0.0564103
	0.05	0.0128205
	0.00384615
	0
	0.0564103
	0.00641026
	0.0230769
	0.00641026
	0.0589744
	0.0384615
	0.0102564
	0.0141026
	0.025641
	0.0551282
	0.0397436
	0.0730769
	0.00512821
	Power Spectral Density (PSD) 40% Spectral Edge
	Comparison between 10 and 20 minute imaging trials
	10 min	20 min
	0.12	0.1
	0.08	0.07
	0.11	0.07
	0.05	0.06
	0.06	0.06
	0.08
	0.06
	0.12
	0.11
	0.07
	0.1
	0.06
	0.09
	0.08
	0.08
	0.07
	0.05
	0.06
	0.05
	0.09
