# Supplementary material for: Age-associated changes to neuronal dynamics involve a disruption of excitatory/inhibitory balance in C. elegans
Source: eLife. 2022 Jun 15;11:e72135. doi: 10.7554/eLife.72135 (PMC9273219; doi:10.7554/eLife.72135)
Supplement: Figure 4—source data 1. [file elife-72135-fig4-data1.xlsx]

## Sheet: Figure 4-source data 1
	Proportion of time each worm displays global neural quiescence
	Wild-type	Worm 1	2	3	4	5	6	7	8	9	10	11	12	13	14	15	16	17	18	19	20
	Day1	0	0.0201754	0.000877193	0.000877193	0	0.0105263	0	0	0	0.00263158	0	0.00877193	0.0789474	0.00964912	0	0	0	0	0.0578947	0
	Day3	0.05	0.0140351	0	0.1	0.0175439	0.316667	0.00526316	0.263158	0.29386	0.110526
	Day6	0	0.240351	0	0.0631579	0	0.196491	0.0412281	0.0192982	0.077193	0.0850877
	Day9	0.170175	0	0.3	0.178947	0.0631579	0.0657895	0.101754	0.142982	0.175439	0.0666667	0	0	0.135965	0	0.095614	0.0157895	0.00964912	0	0.183333	0.485088
	Day12	0.307018	0.476316	0.312281	0.272807	0.0140351	0	0	0.0684211	0	0
	unc-2(gof)	Worm 1	2	3	4	5	6	7	8	9	10	11	12	13	14	15	16	17	18	19	20
	Day1	0.0157895	0.0263158	0	0	0.182456	0.107895	0.180702	0.00877193	0.0385965	0	0	0	0.000877193	0.0438596	0.169298	0.0789474	0.00263158	0.00175439
	Day3
	Day6
	Day9	0.120175	0	0.0657895	0.077193	0.325439	0	0.054386	0	0	0.00438596	0	0	0.0824561	0.0184211	0.00263158	0	0.224561	0.60614	0
	Day12
	unc-2(lof)	Worm 1	2	3	4	5	6	7	8	9	10	11	12	13	14	15	16	17	18	19	20
	Day1	0.00350877	0	0.251754	0	0	0	0.0701754	0.0605263	0.1	0.3	0.0105263	0	0	0	0	0	0.0710526	0.0631579	0.142105
	Day3
	Day6
	Day9	0.197368	0	0	0.0394737	0.0631579	0	0	0	0	0.358772	0.379825	0.0105263	0.246491	0	0	0	0.114035
	Day12
	ced-4	Worm 1	2	3	4	5	6	7	8	9	10	11	12	13	14	15	16	17	18	19	20
	Day1	0.0245614	0.182456	0.0385965	0.179825	0.0868421	0	0.162281	0.0947368	0.0254386	0	0.0640351	0	0.15614	0.0280702	0.0114035	0.0666667	0.0438596	0.0131579
	Day3
	Day6
	Day9	0.0140351	0	0.0280702	0	0.592982	0	0	0.00175439	0.027193	0.0745614	0.114912	0.00877193	0.114035	0.392105	0	0.00614035	0	0.277193	0.272807
	Day12
	muscimol	Worm 1	2	3	4	5	6	7	8	9	10	11	12	13	14	15	16	17	18	19	20
	Day1	0	0	0.000877193	0	0.00438596	0.0254386	0.00877193	0.0210526	0.0877193	0.00175439	0.0201754	0	0	0	0.0991228	0.00175439	0.0184211
	Day3
	Day6
	Day9	0.00350877	0.0342105	0.158772	0.261404	0.0842105	0.0964912	0.125439	0.140351	0.0105263	0.308772	0.117544	0.142105	0.335965	0.0298246	0.235965	0.109649	0.0307018	0.00877193	0.0184211
	Day12
	unc-49	Worm 1	2	3	4	5	6	7	8	9	10	11	12	13	14	15	16	17	18	19	20
	Day1	0	0	0	0.0429825	0	0.00350877	0.0307018	0	0.00526316	0.00175439	0	0.022807	0.00701754	0.127193	0	0	0.000877193	0.118421	0.131579
	Day3
	Day6
	Day9
	Day12
	daf-2	Worm 1	2	3	4	5	6	7	8	9	10	11	12	13	14	15	16	17	18	19	20
	Day1	0	0.0236842	0.164035	0.108772	0	0.000877193	0	0.0289474	0.192982	0	0.0394737	0.00263158	0	0.195614	0	0.439474	0.0535088	0.000877193	0
	Day3
	Day6
	Day9	0.0561404	0	0	0.00175439	0.369298	0	0.308772	0	0.0245614	0.0719298	0	0.0307018	0	0.0508772	0.361404	0	0	0.00964912	0.333333
	Day12
