# Supplementary material for: Age-associated changes to neuronal dynamics involve a disruption of excitatory/inhibitory balance in C. elegans
Source: eLife. 2022 Jun 15;11:e72135. doi: 10.7554/eLife.72135 (PMC9273219; doi:10.7554/eLife.72135)
Supplement: Figure 4—source data 2. [file elife-72135-fig4-data2.xlsx]

## Sheet: Figure S8B
	NEGATIVE CORRELATION PROPORTION
	Day1	Day9
	No Quiescence	No Quiescence	Quiescence
	0.0333333	0.0551282	0.0872
	0.171795	0.025641	0.0128
	0.188462	0.00384615	0.0026
	0.128205	0.0102564	0.009
	0.179487	0.0615385	0.0308
	0.0820513	0.0525641	0.05
	0.134615	0.0179487	0.0308
	0.132051	0.0974359	0.0231
	0.239744	0.0602564	0.0679
	0.0923077	0.0307692	0.0218
	0.0294872	0.0474359
	0.180769	0.00384615
	0.175641	0.0794872
	0.112821	0.0346154
	0.0141026	0.0961538
	0.10641	0.0423077
	0.110256
	0.0807692
	POSITIVE CORRELATION PROPORTION
	Day1	Day9
	No Quiescence	No Quiescence	Quiescence
	0.191026	0.0974359	0.3128
	0.215385	0.251282	0.4308
	0.239744	0.411538	0.5436
	0.275641	0.444872	0.4256
	0.334615	0.467949	0.5487
	0.388462	0.164103	0.2026
	0.29359	0.320513	0.4128
	0.328205	0.496154	0.5128
	0.319231	0.175641	0.3641
	0.139744	0.311538	0.3551
	0.305128	0.338462
	0.321795	0.205128
	0.361538	0.311538
	0.274359	0.164103
	0.289744	0.162821
	0.338462	0.278205
	0.279487
	0.219231
	Power Spectral Density (PSD) 40% Spectral Edge
	Day1	Day9
	No Quiescence	No Quiescence	Quiescence
	0.06	0.04	0.07
	0.08	0.07	0.06
	0.06	0.06	0.07
	0.06	0.12	0.06
	0.03	0.05	0.13
	0.05	0.09	0.06
	0.05	0.06	0.09
	0.05	0.06	0.06
	0.06	0.07	0.07
	0.12	0.07	0.06
	0.06	0.08
	0.03	0.1
	0.06	0.07
	0.07	0.09
	0.05	0.06
	0.04	0.06
	0.05
	0.07
