# Supplementary material for: Age-associated changes to neuronal dynamics involve a disruption of excitatory/inhibitory balance in C. elegans
Source: eLife. 2022 Jun 15;11:e72135. doi: 10.7554/eLife.72135 (PMC9273219; doi:10.7554/eLife.72135)
Supplement: Figure 5—source data 1. [file elife-72135-fig5-data1.xlsx]

## Sheet: Figure 5-source data 1
	REVERSAL FREQUENCIES
	Day1			Day6
	Wild-type	unc-2(gof)	unc-2(lof)	Wild-type	unc-2(gof)	unc-2(lof)
	0.491217	1.51093	0.100026	2.17821	2.20058	0.100026
	1.10029	2.05722	0.200053	1.40037	1.40037	0.15989
	0.500132	1.60042	0.100026	1.84326	2.00053	0.755252
	0.332892	2.70072	0	0.163774	1.9005	0
	1.27966	2.34959	0.100026	1.9005	1.9005	0
	1.40074	2.22893	0.600159	1.38417	1.89619	0.300079
	1.00026	1.10029	0	0.800212	2.10056	0.100026
	0	1.40037	0.100026	0.800212	1.60042	0.100026
	0.541918	2.60345	0.200053	0.700185	1.40037	0.300079
	0.700185	2.90077	0.100026	0.600159	1.13773	0.320322
	1.10165	1.70045	0.100026	2.3709	1.60042	0
	0.700185	2.10056	0.100026	0.800212	0.100026	0.300079
	1.10029	1.98975	0	1.9005	0.600159	0.200053
	0	2.70072	0	1.44429	2.30061	0.200053
	0.600159	1.40037	0.167332	3.04787	2.00053	0.100026
	0.503669	2.20058	0.146204	2.32129	2.10056	0
	0.400106	3.83556	0.191139	0.400106	2.10056	0.100026
	0.900238	2.58562	0	0.700185	1.60042	0.501828
	0.800212	2.67054	0.200053	0.888932	1.70045	0.300079
	0.800212	1.26086	0.100026	0.674408	2.90077	0
	0.504005	2.10056	0	0.400106	1.00026	0.100026
	1.24725	1.70045	0.100026	1.04944	2.40064	0.239987
	1.54082	5.09705	0	1.80048		0.100026
	0.564908	2.20058	0	2.34569		0.300079
	0	2.63066	0	1.30034		0.100026
	0		0.100026	0.748018		0.200053
	0.832021
	0.470894
