# Supplementary material for: Age-associated changes to neuronal dynamics involve a disruption of excitatory/inhibitory balance in C. elegans
Source: eLife. 2022 Jun 15;11:e72135. doi: 10.7554/eLife.72135 (PMC9273219; doi:10.7554/eLife.72135)
Supplement: Figure 5—source data 3. [file elife-72135-fig5-data3.xlsx]

## Sheet: Figure 5-source data 3
	POSITIVE CORRELATION PROPORTIONS
Age (day of adulthood)	Day1							Day9
Genotype/ drug treatment	Wild-type	unc-2(gf)	unc-2(lf)	ced-4	muscimol	unc-49	daf-2	Wild-type	unc-2(gf)	unc-2(lf)	ced-4	muscimol	unc-49	daf-2
	0.187179	0.337179	0.075641	0.411538	0.265385	0.314103	0.303846	0.357692	0.151282	0.497436	0.462821	0.189744		0.419231
	0.202564	0.174359	0.220513	0.455128	0.191026	0.255128	0.370513	0.307692	0.125641	0.147436	0.484615	0.398718		0.2
	0.230769	0.224359	0.557692	0.448718	0.267949	0.312821	0.442308	0.580769	0.64359	0.175641	0.364103	0.391026		0.201282
	0.232051	0.205128	0.184615	0.455128	0.225641	0.310256	0.3	0.166667	0.479487	0.270513	0.24359	0.457692		0.360256
	0.330769	0.476923	0.232051	0.430769	0.214103	0.315385	0.289744	0.29359	0.657692	0.314103	0.576923	0.229487		0.662821
	0.35641	0.312821	0.217949	0.320513	0.287179	0.246154	0.338462	0.416667	0.2	0.110256	0.176923	0.479487		0.15641
	0.275641	0.239744	0.194872	0.342308	0.360256	0.376923	0.303846	0.461538	0.412821	0.366667	0.242308	0.162821		0.310256
	0.333333	0.408974	0.316667	0.330769	0.283333	0.271795	0.274359	0.44359	0.14359	0.394872	0.296154	0.180769		0.3
	0.297436	0.510256	0.348718	0.391026	0.347436	0.261538	0.425641	0.469231	0.266667	0.308974	0.447436	0.267949		0.419231
	0.157692	0.308974	0.362821	0.262821	0.235897	0.307692	0.391026	0.505128	0.10641	0.883333	0.462821	0.301282		0.162821
	0.283333	0.0653846	0.185897	0.314103	0.326923	0.160256	0.29359	0.192308	0.108974	0.448718	0.333333	0.233333		0.388462
	0.270513	0.0525641	0.224359	0.315385	0.330769	0.305128	0.337179	0.320513	0.269231	0.366667	0.315385	0.579487		0.3
	0.35641	0.138462	0.30641	0.411538	0.253846	0.398718	0.280769	0.142308	0.479487	0.116667	0.391026	0.411538		0.408974
	0.329487	0.437179	0.20641	0.258974	0.197436	0.242308	0.312821	0.114103	0.379487	0.215385	0.505128	0.101282		0.461538
	0.297436	0.473077	0.180769	0.314103	0.434615	0.157692	0.233333	0.308974	0.357692	0.0564103	0.274359	0.4		0.603846
	0.257692	0.491026	0.242308	0.292308	0.303846	0.308974	0.379487	0.344872	0.403846	0.203846	0.251282	0.258974		0.389744
	0.357692	0.208974	0.201282	0.334615	0.228205	0.383333	0.460256	0.130769	0.275641	0.339744	0.297436	0.338462		0.389744
	0.230769	0.15641	0.323077	0.241026		0.315385	0.320513	0.225641	0.552564		0.491026	0.196154		0.316667
	0.315385		0.255128			0.339744	0.320513	0.484615	0.355128		0.385897	0.237179		0.407692
	0.185897							0.396154
