# Supplementary material for: Age-associated changes to neuronal dynamics involve a disruption of excitatory/inhibitory balance in C. elegans
Source: eLife. 2022 Jun 15;11:e72135. doi: 10.7554/eLife.72135 (PMC9273219; doi:10.7554/eLife.72135)
Supplement: Figure 6—source data 1. [file elife-72135-fig6-data1.xlsx]

## Sheet: Figure 6-source data 1
	Power Spectral Density (PSD) 40% Spectral Edge					NEGATIVE CORRELATION PROPORTIONS
	Day1		Day9			Day1		Day9
	Wild-type	ced-4	Wild-type	ced-4		Wild-type	ced-4	Wild-type	ced-4
	0.05	0.07	0.12	0.05		0.0333333	0.265385	0.0128205	0.0666667
	0.09	0.06	0.08	0.05		0.139744	0.105128	0.05	0.101282
	0.05	0.06	0.11	0.07		0.182051	0.0512821	0.0166667	0.0333333
	0.05	0.05	0.05	0.05		0.111538	0.144872	0.0641026	0.0948718
	0.05	0.06	0.06	0.05		0.138462	0.0589744	0.05	0.0782051
	0.04	0.03	0.08	0.05		0.0769231	0.173077	0.00384615	0.0692308
	0.05	0.05	0.06	0.07		0.138462	0.142308	0	0.0794872
	0.04	0.1	0.12	0.07		0.117949	0.0666667	0.0564103	0.130769
	0.05	0.03	0.11	0.06		0.232051	0.269231	0.00641026	0.0987179
	0.1	0.04	0.07	0.06		0.0333333	0.130769	0.0230769	0.121795
	0.06	0.07	0.1	0.06		0.0166667	0.0948718	0.00641026	0.0833333
	0.05	0.06	0.06	0.05		0.176923	0.205128	0.0589744	0.0794872
	0.04	0.05	0.09	0.06		0.108974	0.239744	0.0384615	0.0897436
	0.05	0.1	0.08	0.05		0.175641	0.0128205	0.0102564	0.0846154
	0.06	0.04	0.08	0.07		0.151282	0.1	0.0141026	0.176923
	0.04	0.09	0.07	0.05		0.0282051	0.247436	0.025641	0.123077
	0.05	0.04	0.05	0.08		0.155128	0.208974	0.0551282	0.0525641
	0.05	0.09	0.06	0.04		0.101282	0.147436	0.0397436	0.123077
	0.07		0.05	0.05		0.107692		0.0730769	0.0628205
	0.09		0.09			0.0717949		0.00512821
