# Supplementary material for: Age-associated changes to neuronal dynamics involve a disruption of excitatory/inhibitory balance in C. elegans
Source: eLife. 2022 Jun 15;11:e72135. doi: 10.7554/eLife.72135 (PMC9273219; doi:10.7554/eLife.72135)
Supplement: Figure 7—source data 1. [file elife-72135-fig7-data1.xlsx]

## Sheet: Figure 7-source data 1
	Power Spectral Density (PSD) 40% Spectral Edge							NEGATIVE CORRELATION PROPORTIONS
	Day1			Day9				Day1			Day9
	Untreated	Muscimol	unc-49	Untreated	Muscimol	unc-49		Untreated	Muscimol	unc-49	Untreated	Muscimol	unc-49
	0.05	0.04	0.08	0.12	0.05			0.0333333	0.108974	0.105128	0.0128205	0.00512821
	0.09	0.05	0.09	0.08	0.04			0.139744	0.0487179	0.0692308	0.05	0.0115385
	0.05	0.05	0.07	0.11	0.07			0.182051	0.0807692	0.185897	0.0166667	0.0320513
	0.05	0.05	0.06	0.05	0.03			0.111538	0.14359	0.196154	0.0641026	0.00128205
	0.05	0.06	0.08	0.06	0.05			0.138462	0.0487179	0.161538	0.05	0.025641
	0.04	0.05	0.07	0.08	0.05			0.0769231	0.114103	0.0333333	0.00384615	0.0025641
	0.05	0.05	0.06	0.06	0.05			0.138462	0.139744	0.167949	0	0.024359
	0.04	0.04	0.07	0.12	0.1			0.117949	0.225641	0.2	0.0564103	0.0192308
	0.05	0.05	0.08	0.11	0.06			0.232051	0.0846154	0.215385	0.00641026	0.0679487
	0.1	0.05	0.06	0.07	0.04			0.0333333	0.0487179	0.117949	0.0230769	0.0102564
	0.06	0.03	0.1	0.1	0.06			0.0166667	0.111538	0.025641	0.00641026	0.00512821
	0.05	0.04	0.07	0.06	0.05			0.176923	0.225641	0.128205	0.0589744	0
	0.04	0.04	0.06	0.09	0.08			0.108974	0.0717949	0.0487179	0.0384615	0.00897436
	0.05	0.05	0.08	0.08	0.07			0.175641	0.10641	0.0615385	0.0102564	0.0153846
	0.06	0.05	0.08	0.08	0.06			0.151282	0.0461538	0.0269231	0.0141026	0.0205128
	0.04	0.06	0.06	0.07	0.08			0.0282051	0.165385	0.0833333	0.025641	0.0025641
	0.05	0.03	0.06	0.05	0.05			0.155128	0.0589744	0.155128	0.0551282	0.0192308
	0.05		0.09	0.06	0.05			0.101282		0.110256	0.0397436	0.0358974
	0.07		0.05	0.05	0.04			0.107692		0.124359	0.0730769	0.0897436
	0.09			0.09				0.0717949			0.00512821
