# Supplementary material for: Age-associated changes to neuronal dynamics involve a disruption of excitatory/inhibitory balance in C. elegans
Source: eLife. 2022 Jun 15;11:e72135. doi: 10.7554/eLife.72135 (PMC9273219; doi:10.7554/eLife.72135)
Supplement: Figure 8—source data 2. [file elife-72135-fig8-data2.xlsx]

## Sheet: Figure S11A
	Reversal Frequencies
	Day1		Day6
	Wild-type	daf-2	Wild-type	daf-2
	0.491217	1.91408	2.17821	0.503781
	1.10029	2.28195	1.40037	2.32666
	0.500132	1.60468	1.84326	0.800212
	0.332892	2.20392	0.163774	3.04599
	1.27966	2.5234	1.9005	1.5004
	1.40074	1.9005	1.38417	1.35499
	1.00026	1.51674	0.800212	1.78313
	0	1.5004	0.800212	1.30034
	0.541918	1.5004	0.700185	0
	0.700185	2.63906	0.600159	0.500132
	1.10165	1.50099	2.3709	1.37148
	0.700185	1.9005	0.800212	2.51835
	1.10029	1.00026	1.9005	0.600159
	0	2.19668	1.44429	1.70045
	0.600159	1.0879	3.04787	3.27976
	0.503669	2.40957	2.32129	1.30034
	0.400106	2.73992	0.400106	1.40037
	0.900238	1.49528	0.700185	1.40037
	0.800212	1.80048	0.888932	1.40037
	0.800212	1.60042	0.674408	1.10029
	0.504005	1.5004	0.400106
	1.24725	0.800212	1.04944
	1.54082	2.10056	1.80048
	0.564908	1.5004	2.34569
	0	2.83125	1.30034
	0	1.10029	0.748018
	0.832021	1.80048
	0.470894	1.60042
		1.9005
		2.41574
		1.40037
		3.46517
		2.00053
		1.60042
		1.48088
		1.60042
		2.20058
		2.01382
