# Supplementary material for: Age-associated changes to neuronal dynamics involve a disruption of excitatory/inhibitory balance in C. elegans
Source: eLife. 2022 Jun 15;11:e72135. doi: 10.7554/eLife.72135 (PMC9273219; doi:10.7554/eLife.72135)
Supplement: Figure 8—source data 3. [file elife-72135-fig8-data3.xlsx]

## Sheet: Figure 8-source data 3
	RISE TIME
	Day1				Day9
	Wild-type		daf-2		Wild-type		daf-2
	Worm	Rise Time (sec)	Worm	Rise Time (sec)	Worm	Rise Time (sec)	Worm	Rise Time (sec)
	1	1.73171	1	0.649477	1	2.31362	1	1.34416
		3.76644		0.759982	2	2.01808	2	2.22941
	2	2.3901	2	2.48846		2.11606	3	1.7835
		1.64981	3	5.08229	3	2.21851	4	1.22458
	3	3.85266		1.46701		2.98958		1.03978
		2.20844	4	0.733986	4	5.49777	5	0.966286
	4	1.57698		0.8575		7.87836		1.1054
	5	4.45048	5	1.79922		13.9125		1.53841
		4.49602		1.42828		10.8946	6	1.01795
	6	0.664468		2.2452		11.7225		0.820633
	7	1.49053	6	2.40036	5	2.32219	7	4.12354
	8	2.33205	7	4.30822		3.66547		1.36756
		3.76315				3.04288		0.902422
		2.15991				2.75568	8	0.760475
	9	0.938707				2.68726	9	1.62953
		1.03189			6	2.56905		1.96951
	10	1.45899			7	10.4183	10	1.30347
		1.56024				7.49983		2.63658
	11	3.15182			8	4.1137	11	2.26785
	12	2.01556				3.38039		3.15905
		3.57909			9	4.0412		5.59585
	13	5.34857			10	3.33312		2.01736
		3.41141				4.58034		3.2306
	14	5.06934			11	2.91706		3.64461
		3.39105				2.96554	12	3.47207
		2.05855				2.85126	13	1.31107
	15	1.9243				3.32336		0.939398
	16	2.02948				5.3005	14	1.3162
	17	2.4854				7.73844		1.10541
		2.40604			12	3.18857
		2.38899				4.74081
	18	1.58588			13	2.96157
	19	2.31378			14	2.39606
		1.7048			15	2.11071
	20	3.0869				1.94126
		4.0509			16	2.61444
		2.47085				4.89845
						7.00244
	FALL TIME
	Day1				Day9
	Wild-type		daf-2		Wild-type		daf-2
	Worm	Fall Time (sec)	Worm	Fall Time (sec)	Worm	Fall Time (sec)	Worm	Fall Time (sec)
	1	10.5136	1	9.32568	1	14.8671	1	15.3847
		8.52663		9.56936	2	15.9098	2	26.6912
	2	16.838	2	12.2419		10.4829		15.5747
	3	10.5612	3	9.572	3	19.6578	3	13.1956
	4	12.4268	4	7.15864	4	8.43132		14.3318
		12.1899		7.63681		7.76793	4	16.4483
	5	13.6022	5	8.85784		6.31591		15.5998
	6	16.6879		13.8229		7.84716	5	9.97262
	7	13.4442		9.89516		9.19843		7.88491
	8	10.773	6	8.82709	5	16.9534		7.84911
	9	12.5138		10.3757		12.9485	6	17.1262
	10	11.7192		9.95361		15.5726	7	27.9926
		10.6268	7	14.3167		17.1056	8	13.3398
	11	14.1347		10.8408	6	13.8383		11.2396
	12	17.3295	8	12.8637	7	15.1058	9	11.1429
	13	10.6912				16.1745		12.9078
		11.8706			8	13.4464	10	6.59139
	14	8.45031				18.9735		6.44202
	15	8.45402			9	19.5498		6.7245
		8.60141				18.2146		6.1926
		8.38322				25.5043		7.3464
	16	14.8772			10	11.4092		6.48374
		14.4309				9.78045	11	16.541
	17	16.6057			11	15.2394		10.0362
		14.8604				15.1772		15.2444
		15.9048				12.7446	12	8.3636
	18	14.6715			12	23.1553		8.65927
		12.9409			13	16.7102		10.2341
	19	19.2079				16.1301		10.9056
		11.3619			14	13.9563	13	13.1231
		12.8173				15.9944
	20	10.572				11.4344
		11.7335
