# Supplementary material for: Age-associated changes to neuronal dynamics involve a disruption of excitatory/inhibitory balance in C. elegans
Source: eLife. 2022 Jun 15;11:e72135. doi: 10.7554/eLife.72135 (PMC9273219; doi:10.7554/eLife.72135)
Supplement: Figure 8—source data 4. [file elife-72135-fig8-data4.xlsx]

## Sheet: Figure 8-source data 4
	Duty ratio (time active/ inactive) of the AVA interneuron
	Day1		Day9
	Wild-type	daf-2	Wild-type	daf-2
	0.12125	0.485	0.777083	0.639167
	0.313333	0.399167	0.704583	0.69
	0.172917	0.0229167	0.524583	0.66875
	0.27125	0.45875	0.493333	0.58375
	0.243333	0.372917	0.263333	0.524583
	0.282083	0.367917	0.3425	0.432917
	0.10625	0.4025	0.466667	0.709167
	0.20875	0.302917	0.13875	0.715
	0.345833	0.163333	0.578333	0.678333
	0.0575	0.29875	0.556667	0.707083
	0.333333	0.315833	0.32375	0.3575
	0.120417	0.205833	0.40625	0.106667
	0.189583	0.321667		0.674167
	0.159167	0.15125		0.402083
	0.310417	0.03875		0.630833
	0.35375
	0.359583
	0.29875
	0.27125
	0.390417
	0.309583
